# Supplementary material
Source: Research Square preprint supplement (doi:10.21203/rs.3.rs-9483680/v1)
Supplement: Supplementary file 1 [file 753ca10ed2b02dda97ca5d5b.xlsx]

## Sheet: Sheet1
Specie	locality	reference	Color	Simbol	Teeth	n	Lmin	Lmean	Lmax	n	Wmin	Wmean	Wmax
Microdyromys boveri sp. nov.	NB-1 (Mallorca)	this paper	Green	▲	P4	58	1.03	1.17	1.26	57	1.43	1.62	1.78
Microdyromys boveri sp. nov.	NB-1 (Mallorca)	this paper	Green	▲	M1-M2	145	1.33	1.58	1.74	146	1.61	1.97	2.24
Microdyromys boveri sp. nov.	NB-1 (Mallorca)	this paper	Green	▲	M3	70	1	1.27	1.37	70	1.3	1.67	1.81
Microdyromys boveri sp. nov.	NB-1 (Mallorca)	this paper	Green	▲	p4	63	1.23	1.43	1.58	62	1	1.32	1.47
Microdyromys boveri sp. nov.	NB-1 (Mallorca)	this paper	Green	▲	m1	89	1.33	1.57	1.7	90	1.55	1.85	2.04
Microdyromys boveri sp. nov.	NB-1 (Mallorca)	this paper	Green	▲	m2	73	1.48	1.6	1.7	74	1.75	1.92	2.13
Microdyromys boveri sp. nov.	NB-1 (Mallorca)	this paper	Green	▲	m3	82	1.17	1.37	1.49	84	1.42	1.54	1.66
Hypnomys morpheus	Cova de sa Bassa Blanca (Mallorca)	this paper	Red	●	P4	5	1.32	1.45	1.64	5	1.83	1.97	2.18
Hypnomys morpheus	Cova de sa Bassa Blanca (Mallorca)	this paper	Red	●	M1-M2	14	1.81	2.1	2.29	14	2.22	2.38	2.51
Hypnomys morpheus	Cova de sa Bassa Blanca (Mallorca)	this paper	Red	●	M3	6	1.7	1.8	1.93	6	1.99	2.12	2.3
Hypnomys morpheus	Cova de sa Bassa Blanca (Mallorca)	this paper	Red	●	p4	5	1.68	1.77	1.97	5	1.53	1.67	1.92
Hypnomys morpheus	Cova de sa Bassa Blanca (Mallorca)	this paper	Red	●	m1	7	2.02	2.13	2.19	7	2.11	2.21	2.3
Hypnomys morpheus	Cova de sa Bassa Blanca (Mallorca)	this paper	Red	●	m2	9	2.14	2.27	2.38	9	2.21	2.35	2.49
Hypnomys morpheus	Cova de sa Bassa Blanca (Mallorca)	this paper	Red	●	m3	7	1.74	1.83	1.92	8	1.77	1.92	2.07
Hypnomys onicensis	Pedrera de s'Ònix (Mallorca)	Reumer (1981)	Blue	■	P4	8	1.34	1.47	1.55	8	1.76	1.86	1.91
Hypnomys onicensis	Pedrera de s'Ònix (Mallorca)	Reumer (1981)	Blue	■	M1-M2	73	2.09	2.27	2.45	74	1.89	2.07	2.26
Hypnomys onicensis	Pedrera de s'Ònix (Mallorca)	Reumer (1981)	Blue	■	M3	9	1.58	1.67	1.84	10	1.85	1.97	2.07
Hypnomys onicensis	Pedrera de s'Ònix (Mallorca)	Reumer (1981)	Blue	■	p4	8	1.41	1.56	1.76	8	1.32	1.46	1.6
Hypnomys onicensis	Pedrera de s'Ònix (Mallorca)	Reumer (1981)	Blue	■	m1	44	1.93	2.13	2.31	44	1.82	1.97	2.21
Hypnomys onicensis	Pedrera de s'Ònix (Mallorca)	Reumer (1981)	Blue	■	m2	26	1.98	2.17	2.31	25	1.99	2.11	2.29
Hypnomys onicensis	Pedrera de s'Ònix (Mallorca)	Reumer (1981)	Blue	■	m3	9	1.62	1.71	1.82	9	1.69	1.77	1.85
Hypnomys waldreni	Cap Farrutx (Mallorca)	Reumer (1979)	Yellow	*	P4	9	1.18	1.33	1.42	9	1.28	1.65	1.84
Hypnomys waldreni	Cap Farrutx (Mallorca)	Reumer (1979)	Yellow	*	M1-M2	19	1.6	1.86	2.1	19	1.87	2.06	2.27
Hypnomys waldreni	Cap Farrutx (Mallorca)	Reumer (1979)	Yellow	*	M3	12	1.4	1.53	1.62	12	1.66	1.81	1.91
Hypnomys waldreni	Cap Farrutx (Mallorca)	Reumer (1979)	Yellow	*	p4	13	1.39	1.5	1.58	13	1.29	1.36	1.45
Hypnomys waldreni	Cap Farrutx (Mallorca)	Reumer (1979)	Yellow	*	m1	13	1.71	1.86	2	13	1.67	1.79	1.93
Hypnomys waldreni	Cap Farrutx (Mallorca)	Reumer (1979)	Yellow	*	m2	5	1.81	1.93	1.99	6	1.77	1.87	1.91
Hypnomys waldreni	Cap Farrutx (Mallorca)	Reumer (1979)	Yellow	*	m3	8	1.48	1.63	1.7	8	1.49	1.6	1.68
Hypnomys eliomyoides	Binigaus (Menorca)	Agustí (1980)	Magenta	●	P4	8	1.37	1.45	1.56	8	1.75	1.85	1.94
Hypnomys eliomyoides	Binigaus (Menorca)	Agustí (1980)	Magenta	●	M1-M2	15	1.89	2.05	2.31	13	2.22	2.34	2.51
Hypnomys eliomyoides	Binigaus (Menorca)	Agustí (1980)	Magenta	●	M3	18	1.45	1.64	1.74	18	1.8	1.98	2.11
Hypnomys eliomyoides	Binigaus (Menorca)	Agustí (1980)	Magenta	●	p4	8	1.55	1.67	1.76	8	1.5	1.55	1.62
Hypnomys eliomyoides	Binigaus (Menorca)	Agustí (1980)	Magenta	●	m1	8	1.98	2.13	2.24	8	1.92	2.03	2.13
Hypnomys eliomyoides	Binigaus (Menorca)	Agustí (1980)	Magenta	●	m2	11	2.08	2.15	2.25	11	2.09	2.17	2.27
Hypnomys eliomyoides	Binigaus (Menorca)	Agustí (1980)	Magenta	●	m3	16	1.54	1.72	1.85	16	1.74	1.82	1.9
Hypnomys sp.	Caló den Rafelino (CdR, Mallorca)	Bover et al. (2014)	Black	+	M1-M2	1	-	1.62	-	1	-	1.64	-
Hypnomys sp.	Caló den Rafelino (CdR, Mallorca)	Bover et al. (2014)	Black	+	m1	1	-	1.82	-	1	-	1.96	-
