# Supplementary material
Source: Research Square preprint supplement (doi:10.21203/rs.3.rs-9483680/v1)
Supplement: Supplementary file 1 [file b1eff762df800f49c7a3d8ca.docx]

|  | L | | | | | W | | | | |
| --- | --- | --- | --- | --- | --- | --- | --- | --- | --- | --- |
| Element | **n** | **Min** | **Mean** | **Max** | **σ** | **n** | **Min** | **Mean** | **Max** | **σ** |
| dP4 | 14 | 1.10 | 1.16 | 1.30 | 0.052 | 14 | 1.53 | 1.61 | 1.72 | 0.062 |
| P4 | 58 | 1.03 | 1.17 | 1.26 | 0.045 | 57 | 1.43 | 1.62 | 1.78 | 0.061 |
| M1 | 73 | 1.33 | 1.58 | 1.74 | 0.065 | 76 | 1.61 | 1.90 | 2.10 | 0.085 |
| M2 | 72 | 1.40 | 1.59 | 1.73 | 0.056 | 70 | 1.85 | 2.04 | 2.24 | 0.070 |
| M3 | 70 | 1.00 | 1.27 | 1.37 | 0.056 | 70 | 1.30 | 1.67 | 1.81 | 0.084 |
| dp4 | 10 | 1.05 | 1.12 | 1.25 | 0.055 | 10 | 0.92 | 0.99 | 1.12 | 0.056 |
| p4 | 63 | 1.23 | 1.43 | 1.58 | 0.078 | 62 | 1.00 | 1.32 | 1.47 | 0.078 |
| m1 | 89 | 1.33 | 1.57 | 1.70 | 0.061 | 90 | 1.55 | 1.85 | 2.04 | 0.082 |
| m2 | 73 | 1.48 | 1.60 | 1.70 | 0.052 | 74 | 1.75 | 1.92 | 2.13 | 0.072 |
| m3 | 82 | 1.17 | 1.37 | 1.49 | 0.062 | 84 | 1.42 | 1.54 | 1.66 | 0.053 |
