# Supplementary material
Source: Research Square preprint supplement (doi:10.21203/rs.3.rs-9483680/v1)
Supplement: Supplementary file 2 [file 8449acef6ab4c5704f73812c.xlsx]

## Sheet: Sheet1
Specie	locality	Sp.	Color	Symbol	Locality	Teeth	n	Lmin	Lmean	Lmax	n	Wmin	Wmean	Wmax	reference
Microdyromys sp.	Na Burguesa-1 (NB-1)	Microdyromys boveri sp. nov.	Green	▲	NB-1	P4	58	1.03	1.17	1.26	57	1.43	1.62	1.78	this paper
Microdyromys sp.	Na Burguesa-1 (NB-1)	Microdyromys boveri sp. nov.	Green	▲	NB-1	M1-M2	145	1.33	1.58	1.74	146	1.61	1.97	2.24	this paper
Microdyromys sp.	Na Burguesa-1 (NB-1)	Microdyromys boveri sp. nov.	Green	▲	NB-1	M3	70	1	1.27	1.37	70	1.3	1.67	1.81	this paper
Microdyromys sp.	Na Burguesa-1 (NB-1)	Microdyromys boveri sp. nov.	Green	▲	NB-1	p4	63	1.23	1.43	1.58	62	1	1.32	1.47	this paper
Microdyromys sp.	Na Burguesa-1 (NB-1)	Microdyromys boveri sp. nov.	Green	▲	NB-1	m1	89	1.33	1.57	1.7	90	1.55	1.85	2.04	this paper
Microdyromys sp.	Na Burguesa-1 (NB-1)	Microdyromys boveri sp. nov.	Green	▲	NB-1	m2	73	1.48	1.6	1.7	74	1.75	1.92	2.13	this paper
Microdyromys sp.	Na Burguesa-1 (NB-1)	Microdyromys boveri sp. nov.	Green	▲	NB-1	m3	82	1.17	1.37	1.49	84	1.42	1.54	1.66	this paper
Microdyromys complicatus	Armantes 7	Microdyromys complicatus	Red	●	Amantes-7	P4	4	0.6	0.63	0.67	4	0.74	0.83	0.88	De Bruijn, 1966
Microdyromys complicatus	Armantes 7	Microdyromys complicatus	Red	●	Amantes-7	M1-M2	13	0.95	0.99	1.05	13	0.98	1.11	1.23	De Bruijn, 1966
Microdyromys complicatus	Armantes 7	Microdyromys complicatus	Red	●	Amantes-7	M3	7	0.72	0.78	0.88	7	0.91	0.98	1.05	De Bruijn, 1966
Microdyromys complicatus	Armantes 7	Microdyromys complicatus	Red	●	Amantes-7	p4	4	0.67	0.71	0.77	4	0.67	0.7	0.74	De Bruijn, 1966
Microdyromys complicatus	Armantes 7	Microdyromys complicatus	Red	●	Amantes-7	m1	5	0.95	1.01	1.05	5	0.88	0.95	1.02	De Bruijn, 1966
Microdyromys complicatus	Armantes 7	Microdyromys complicatus	Red	●	Amantes-7	m2	6	0.98	1.01	1.05	6	0.98	1.01	1.05	De Bruijn, 1966
Microdyromys complicatus	Armantes 7	Microdyromys complicatus	Red	●	Amantes-7	m3	4	0.88	0.93	0.98	4	0.95	0.97	0.98	De Bruijn, 1966
Microdyromys 'miocaenicus'	Sansán	Microdyromys "miocaenicus"	Blue	■	Sansán	P4	40	0.55	0.62	0.7	40	0.72	0.82	0.93	De Bruijn, 1966
Microdyromys 'miocaenicus'	Sansán	Microdyromys "miocaenicus"	Blue	■	Sansán	M1-M2	98	0.85	0.96	1.07	98	0.92	1.09	1.23	De Bruijn, 1966
Microdyromys 'miocaenicus'	Sansán	Microdyromys "miocaenicus"	Blue	■	Sansán	M3	50	0.71	0.83	1.05	50	0.9	0.98	1.07	De Bruijn, 1966
Microdyromys 'miocaenicus'	Sansán	Microdyromys "miocaenicus"	Blue	■	Sansán	p4	44	0.6	0.68	0.77	44	0.62	0.69	0.77	De Bruijn, 1966
Microdyromys 'miocaenicus'	Sansán	Microdyromys "miocaenicus"	Blue	■	Sansán	m1	100	0.85	0.95	1.05	100	0.83	0.92	1.01	De Bruijn, 1966
Microdyromys 'miocaenicus'	Sansán	Microdyromys "miocaenicus"	Blue	■	Sansán	m2	98	0.85	0.99	1.13	98	0.83	0.96	1.1	De Bruijn, 1966
Microdyromys 'miocaenicus'	Sansán	Microdyromys "miocaenicus"	Blue	■	Sansán	m3	30	0.84	0.9	0.98	30	0.83	0.9	0.98	De Bruijn, 1966
Microdyromys sinuosus	Ampudia 3	Microdyromys sinuosus	Yellow	●	Ampudia 3	P4	2		0.91		2		1.14		Álvarez Sierra & García Moreno, 1986
Microdyromys sinuosus	Ampudia 3	Microdyromys sinuosus	Yellow	●	Ampudia 3	M1-M2	2		1.28		2		1.51		Álvarez Sierra & García Moreno, 1986
Microdyromys sinuosus	Ampudia 3	Microdyromys sinuosus	Yellow	●	Ampudia 3	M3	2		1.04		2	1.39	1.41	1.42	Álvarez Sierra & García Moreno, 1986
Microdyromys sinuosus	Ampudia 3	Microdyromys sinuosus	Yellow	●	Ampudia 3	p4	2		1.02		2	0.99	1.01	1.02	Álvarez Sierra & García Moreno, 1986
Microdyromys sinuosus	Ampudia 3	Microdyromys sinuosus	Yellow	●	Ampudia 3	m1	1		1.37		1		1.35		Álvarez Sierra & García Moreno, 1986
Microdyromys sinuosus	Ampudia 3	Microdyromys sinuosus	Yellow	●	Ampudia 3	m2	4	1.25	1.31	1.42	4	1.29	1.35	1.42	Álvarez Sierra & García Moreno, 1986
Microdyromys sinuosus	Ampudia 3	Microdyromys sinuosus	Yellow	●	Ampudia 3	m3	2		1.15		2	1.16	1.2	1.25	Álvarez Sierra & García Moreno, 1986
Microdyromys remmerti	Vargas 7	Microdyromys remmerti	Violet	●	Vargas 7	P4	17	0.71	0.77	0.82	17	0.86	0.93	1.02	García-Paredes et al., 2010
Microdyromys remmerti	Vargas 7	Microdyromys remmerti	Violet	●	Vargas 7	M1-M2	99	0.99	1.094	1.2	99	1.14	1.244	1.4	García-Paredes et al., 2010
Microdyromys remmerti	Vargas 7	Microdyromys remmerti	Violet	●	Vargas 7	M3	31	0.91	0.98	1.08	29	1.07	1.15	1.25	García-Paredes et al., 2010
Microdyromys remmerti	Vargas 7	Microdyromys remmerti	Violet	●	Vargas 7	p4	24	0.81	0.85	0.89	24	0.75	0.84	0.91	García-Paredes et al., 2010
Microdyromys remmerti	Vargas 7	Microdyromys remmerti	Violet	●	Vargas 7	m1	47	1.04	1.16	1.29	45	1.04	1.12	1.21	García-Paredes et al., 2010
Microdyromys remmerti	Vargas 7	Microdyromys remmerti	Violet	●	Vargas 7	m2	27	1.11	1.18	1.25	27	1.06	1.13	1.23	García-Paredes et al., 2010
Microdyromys remmerti	Vargas 7	Microdyromys remmerti	Violet	●	Vargas 7	m3	38	0.92	1.02	1.12	37	0.91	0.99	1.06	García-Paredes et al., 2010
Microdyromys koenigswaldi	Valdemoros 3B	Microdyromys Koenigswaldi	Black	+	Valdemoros 3B	P4	9	0.6	0.68	0.74	6	0.8	0.86	0.93	De Bruijn, 1966
Microdyromys koenigswaldi	Valdemoros 3B	Microdyromys Koenigswaldi	Black	+	Valdemoros 3B	M1-M2	25	0.93	1.019	1.13	25	1.02	1.169	1.27	De Bruijn, 1966
Microdyromys koenigswaldi	Valdemoros 3B	Microdyromys Koenigswaldi	Black	+	Valdemoros 3B	M3	11	0.8	0.86	0.9	12	0.94	1.02	1.08	De Bruijn, 1966
Microdyromys koenigswaldi	Valdemoros 3B	Microdyromys Koenigswaldi	Black	+	Valdemoros 3B	p4	7	0.73	0.77	0.81	7	0.75	0.76	0.8	De Bruijn, 1966
Microdyromys koenigswaldi	Valdemoros 3B	Microdyromys Koenigswaldi	Black	+	Valdemoros 3B	m1	11	1.01	1.06	1.15	8	0.95	1	1.06	De Bruijn, 1966
Microdyromys koenigswaldi	Valdemoros 3B	Microdyromys Koenigswaldi	Black	+	Valdemoros 3B	m2	8	1.03	1.09	1.13	8	0.97	1.04	1.1	De Bruijn, 1966
Microdyromys koenigswaldi		Microdyromys Koenigswaldi	Black	+	Valdemoros 3B	m3	8	0.84	0.9	0.95	7	0.83	0.87	0.91	De Bruijn, 1966
Microdyromys chaavi	Oued Zra, Moyen-Atlas, Maroc	Microdyromys chaavi	Green grass	●	Oued Zra	P4	1	-	0.77	-	1	-	0.97	-	Jaeger, 1977
Microdyromys chaavi	Oued Zra, Moyen-Atlas, Maroc	Microdyromys chaavi	Green grass	●	Oued Zra	M1-M2	5	1.08	1.14	1.21	5	1.27	1.33	1.38	Jaeger, 1977
Microdyromys chaavi	Oued Zra, Moyen-Atlas, Maroc	Microdyromys chaavi	Green grass	●	Oued Zra	M3	-	-	-	-	-	-	-	-	Jaeger, 1977
Microdyromys chaavi	Oued Zra, Moyen-Atlas, Maroc	Microdyromys chaavi	Green grass	●	Oued Zra	p4	1	-	0.84	-	1	-	0.74	-	Jaeger, 1977
Microdyromys chaavi	Oued Zra, Moyen-Atlas, Maroc	Microdyromys chaavi	Green grass	●	Oued Zra	m1-m2	3	1.04	1.11	1.17	3	1.13	1.2	1.31	Jaeger, 1977
Microdyromys chaavi	Oued Zra, Moyen-Atlas, Maroc	Microdyromys chaavi	Green grass	●	Oued Zra	m3	-	-	-	-	-	-		-	Jaeger, 1977
