# Supplementary material
Source: Research Square preprint supplement (doi:10.21203/rs.3.rs-9483680/v1)
Supplement: Supplementary file 3 [file 8951b18f4369ab30f6a096c8.xlsx]

## Sheet: Hoja1
				Measurements in mm (after Daams 1981)
Sp.	Site	Nº IMEDEA	Teeth	L	W
Hypnomys morpheus	cova Bassa Blanca	112206	P4	1.47	1.92
Hypnomys morpheus	cova Bassa Blanca	112207	P4	1.44	1.94
Hypnomys morpheus	cova Bassa Blanca	112208	P4	1.39	1.96
Hypnomys morpheus	cova Bassa Blanca	112209	P4	1.64	2.18
Hypnomys morpheus	cova Bassa Blanca	112210	P4	1.32	1.83
Hypnomys morpheus	cova Bassa Blanca	112211	M1-M2	2.29	2.5
Hypnomys morpheus	cova Bassa Blanca	112212	M1-M2	1.81	2.24
Hypnomys morpheus	cova Bassa Blanca	112213	M1-M2	2.11	2.38
Hypnomys morpheus	cova Bassa Blanca	112214	M1-M2	2.03	2.22
Hypnomys morpheus	cova Bassa Blanca	112215	M1-M2	2	2.34
Hypnomys morpheus	cova Bassa Blanca	112216	M1-M2	2.07	2.26
Hypnomys morpheus	cova Bassa Blanca	112217	M1-M2	2.1	2.46
Hypnomys morpheus	cova Bassa Blanca	112218	M1-M2	2.09	2.39
Hypnomys morpheus	cova Bassa Blanca	112219	M1-M2	2.11	2.28
Hypnomys morpheus	cova Bassa Blanca	112220	M1-M2	2.14	2.36
Hypnomys morpheus	cova Bassa Blanca	112221	M1-M2	2.13	2.39
Hypnomys morpheus	cova Bassa Blanca	112222	M1-M2	2.19	2.46
Hypnomys morpheus	cova Bassa Blanca	112223	M1-M2	2.02	2.49
Hypnomys morpheus	cova Bassa Blanca	112224	M1-M2	2.26	2.51
Hypnomys morpheus	cova Bassa Blanca	112225	M3	1.89	2.3
Hypnomys morpheus	cova Bassa Blanca	112276	M3	1.93	2.21
Hypnomys morpheus	cova Bassa Blanca	112277	M3	1.74	2.11
Hypnomys morpheus	cova Bassa Blanca	112278	M3	1.74	1.99
Hypnomys morpheus	cova Bassa Blanca	112279	M3	1.7	2.03
Hypnomys morpheus	cova Bassa Blanca	112280	M3	1.78	2.08
Hypnomys morpheus	cova Bassa Blanca	112281	p4	1.82	1.68
Hypnomys morpheus	cova Bassa Blanca	112282	p4	1.74	1.54
Hypnomys morpheus	cova Bassa Blanca	112283	p4	1.97	1.92
Hypnomys morpheus	cova Bassa Blanca	112284	p4	1.68	1.74
Hypnomys morpheus	cova Bassa Blanca	112285	p4	1.73	1.53
Hypnomys morpheus	cova Bassa Blanca	112286	p4	1.68	1.59
Hypnomys morpheus	cova Bassa Blanca	112287	m1-m2	2.14	2.23
Hypnomys morpheus	cova Bassa Blanca	112288	m1-m2	2.25	2.32
Hypnomys morpheus	cova Bassa Blanca	112289	m1-m2	2.09	2.23
Hypnomys morpheus	cova Bassa Blanca	112290	m1-m2	2.24	2.34
Hypnomys morpheus	cova Bassa Blanca	112291	m1-m2	2.11	2.23
Hypnomys morpheus	cova Bassa Blanca	112292	m1-m2	1.98	2.04
Hypnomys morpheus	cova Bassa Blanca	112293	m1-m2	2.23	2.35
Hypnomys morpheus	cova Bassa Blanca	112294	m1-m2	2.32	2.42
Hypnomys morpheus	cova Bassa Blanca	112295	m1-m2	2.26	2.39
Hypnomys morpheus	cova Bassa Blanca	112296	m1-m2	2.04	2.08
Hypnomys morpheus	cova Bassa Blanca	112297	m1-m2	2.09	2.19
Hypnomys morpheus	cova Bassa Blanca	112298	m1-m2	2.19	2.22
Hypnomys morpheus	cova Bassa Blanca	112299	m1-m2_	2.08	2.13
Hypnomys morpheus	cova Bassa Blanca	112300	m1-m2	2.03	2.02
Hypnomys morpheus	cova Bassa Blanca	112301	m1-m2	2.06	2.13
Hypnomys morpheus	cova Bassa Blanca	112302	m1-m2	2.13	2.21
Hypnomys morpheus	cova Bassa Blanca	112303	m3	1.74	1.81
Hypnomys morpheus	cova Bassa Blanca	112304	m3	1.79	1.89
Hypnomys morpheus	cova Bassa Blanca	112305	m3	1.89	1.96
Hypnomys morpheus	cova Bassa Blanca	112306	m3	-	2.07
Hypnomys morpheus	cova Bassa Blanca	112307	m3	1.87	1.91
Hypnomys morpheus	cova Bassa Blanca	112308	m3	1.92	2.04
Hypnomys morpheus	cova Bassa Blanca	112309	m3	1.79	1.77
Hypnomys morpheus	cova Bassa Blanca	112310	m3	1.84	1.93
Microdyromys boveri sp. nov.	NB-1	112097	dp4_inf	1.1	0.97
Microdyromys boveri sp. nov.	NB-1	112098	dp4_inf	1.1	0.95
Microdyromys boveri sp. nov.	NB-1	112099	dp4_inf	1.08	0.96
Microdyromys boveri sp. nov.	NB-1	112100	dp4_inf	1.25	1.12
Microdyromys boveri sp. nov.	NB-1	112201	dp4_inf	1.07	0.92
Microdyromys boveri sp. nov.	NB-1	112202	dp4_inf	1.11	0.98
Microdyromys boveri sp. nov.	NB-1	112203	dp4_inf	1.12	0.96
Microdyromys boveri sp. nov.	NB-1	112204	dp4_inf	1.05	0.98
Microdyromys boveri sp. nov.	NB-1	112205	dp4_inf	1.14	1.02
Microdyromys boveri sp. nov.	NB-1	103982	dp4_inf	1.14	1.03
Microdyromys boveri sp. nov.	NB-1	107227	dP4_sup	1.3	1.68
Microdyromys boveri sp. nov.	NB-1	107313	dP4_sup	1.13	1.57
Microdyromys boveri sp. nov.	NB-1	107318	dP4_sup	1.1	1.57
Microdyromys boveri sp. nov.	NB-1	107322	dP4_sup	1.16	1.57
Microdyromys boveri sp. nov.	NB-1	107325	dP4_sup	1.2	1.72
Microdyromys boveri sp. nov.	NB-1	107326	dP4_sup	1.13	1.57
Microdyromys boveri sp. nov.	NB-1	107329	dP4_sup	1.15	1.53
Microdyromys boveri sp. nov.	NB-1	107330	dP4_sup	1.18	1.7
Microdyromys boveri sp. nov.	NB-1	107333	dP4_sup	1.21	1.68
Microdyromys boveri sp. nov.	NB-1	107334	dP4_sup	1.16	1.57
Microdyromys boveri sp. nov.	NB-1	107339	dP4_sup	1.12	1.57
Microdyromys boveri sp. nov.	NB-1	107340	dP4_sup	1.15	1.58
Microdyromys boveri sp. nov.	NB-1	107341	dP4_sup	1.13	1.62
Microdyromys boveri sp. nov.	NB-1	107354	dP4_sup	1.11	1.56
Microdyromys boveri sp. nov.	NB-1	107047	m1	1.58	1.86
Microdyromys boveri sp. nov.	NB-1	107048	m1	1.63	1.9
Microdyromys boveri sp. nov.	NB-1	107049	m1	1.62	1.81
Microdyromys boveri sp. nov.	NB-1	107050	m1	1.7	1.98
Microdyromys boveri sp. nov.	NB-1	107052	m1	1.53	1.77
Microdyromys boveri sp. nov.	NB-1	107054	m1	1.54	1.81
Microdyromys boveri sp. nov.	NB-1	107055	m1	1.61	1.83
Microdyromys boveri sp. nov.	NB-1	107056	m1	1.59	1.94
Microdyromys boveri sp. nov.	NB-1	107057	m1	1.59	1.92
Microdyromys boveri sp. nov.	NB-1	107058	m1	1.5	1.72
Microdyromys boveri sp. nov.	NB-1	107061	m1	1.6	1.86
Microdyromys boveri sp. nov.	NB-1	107062	m1	1.5	1.79
Microdyromys boveri sp. nov.	NB-1	107063	m1	1.62	1.84
Microdyromys boveri sp. nov.	NB-1	107064	m1	1.59	1.87
Microdyromys boveri sp. nov.	NB-1	107065	m1	1.47	1.66
Microdyromys boveri sp. nov.	NB-1	107066	m1	1.6	1.92
Microdyromys boveri sp. nov.	NB-1	107067	m1	1.51	1.8
Microdyromys boveri sp. nov.	NB-1	107068	m1	1.48	1.77
Microdyromys boveri sp. nov.	NB-1	107069	m1	1.39	1.57
Microdyromys boveri sp. nov.	NB-1	107070	m1	1.49	1.89
Microdyromys boveri sp. nov.	NB-1	107071	m1	1.5	1.85
Microdyromys boveri sp. nov.	NB-1	107076	m1	1.59	1.94
Microdyromys boveri sp. nov.	NB-1	107077	m1	1.53	1.83
Microdyromys boveri sp. nov.	NB-1	107078	m1	1.59	1.92
Microdyromys boveri sp. nov.	NB-1	107079	m1	1.6	1.86
Microdyromys boveri sp. nov.	NB-1	107080	m1	1.6	1.94
Microdyromys boveri sp. nov.	NB-1	107083	m1	1.59	1.89
Microdyromys boveri sp. nov.	NB-1	107084	m1	1.58	1.85
Microdyromys boveri sp. nov.	NB-1	107085	m1	1.61	1.83
Microdyromys boveri sp. nov.	NB-1	107086	m1	1.66	1.9
Microdyromys boveri sp. nov.	NB-1	107087	m1	1.57	1.94
Microdyromys boveri sp. nov.	NB-1	107088	m1	1.51	1.89
Microdyromys boveri sp. nov.	NB-1	107089	m1	1.56	1.78
Microdyromys boveri sp. nov.	NB-1	107090	m1	1.56	1.9
Microdyromys boveri sp. nov.	NB-1	107091	m1	1.66	1.88
Microdyromys boveri sp. nov.	NB-1	107092	m1	1.56	1.85
Microdyromys boveri sp. nov.	NB-1	107093	m1	1.62	1.89
Microdyromys boveri sp. nov.	NB-1	107094	m1	1.55	1.83
Microdyromys boveri sp. nov.	NB-1	107095	m1	1.58	1.73
Microdyromys boveri sp. nov.	NB-1	107096	m1	1.6	1.84
Microdyromys boveri sp. nov.	NB-1	107097	m1	1.33	1.55
Microdyromys boveri sp. nov.	NB-1	107098	m1	1.65	1.89
Microdyromys boveri sp. nov.	NB-1	107099	m1	1.53	1.77
Microdyromys boveri sp. nov.	NB-1	107100	m1	1.68	1.92
Microdyromys boveri sp. nov.	NB-1	107102	m1	1.5	1.77
Microdyromys boveri sp. nov.	NB-1	107103	m1	1.56	1.72
Microdyromys boveri sp. nov.	NB-1	107105	m1	1.55	1.86
Microdyromys boveri sp. nov.	NB-1	107107	m1	1.53	1.91
Microdyromys boveri sp. nov.	NB-1	107108	m1	1.56	1.83
Microdyromys boveri sp. nov.	NB-1	107109	m1	1.5	1.8
Microdyromys boveri sp. nov.	NB-1	107110	m1	1.62	1.88
Microdyromys boveri sp. nov.	NB-1	107112	m1	-	1.83
Microdyromys boveri sp. nov.	NB-1	107120	m1	1.49	1.79
Microdyromys boveri sp. nov.	NB-1	107130	m1	1.6	1.95
Microdyromys boveri sp. nov.	NB-1	107144	m1	1.6	1.9
Microdyromys boveri sp. nov.	NB-1	107145	m1	1.59	2.04
Microdyromys boveri sp. nov.	NB-1	107148	m1	1.6	1.9
Microdyromys boveri sp. nov.	NB-1	107162	m1	1.57	1.85
Microdyromys boveri sp. nov.	NB-1	107163	m1	1.6	1.86
Microdyromys boveri sp. nov.	NB-1	107164	m1	1.58	1.87
Microdyromys boveri sp. nov.	NB-1	107165	m1	1.53	1.84
Microdyromys boveri sp. nov.	NB-1	107166	m1	1.64	1.76
Microdyromys boveri sp. nov.	NB-1	107168	m1	1.58	1.79
Microdyromys boveri sp. nov.	NB-1	107169	m1	1.64	1.96
Microdyromys boveri sp. nov.	NB-1	107170	m1	1.64	1.9
Microdyromys boveri sp. nov.	NB-1	107171	m1	1.64	1.96
Microdyromys boveri sp. nov.	NB-1	107172	m1	1.69	1.93
Microdyromys boveri sp. nov.	NB-1	107174	m1	1.56	1.84
Microdyromys boveri sp. nov.	NB-1	107175	m1	1.55	1.89
Microdyromys boveri sp. nov.	NB-1	107177	m1	1.51	1.77
Microdyromys boveri sp. nov.	NB-1	107178	m1	1.54	1.85
Microdyromys boveri sp. nov.	NB-1	107179	m1	1.65	1.89
Microdyromys boveri sp. nov.	NB-1	107181	m1	1.61	1.95
Microdyromys boveri sp. nov.	NB-1	107182	m1	1.57	1.85
Microdyromys boveri sp. nov.	NB-1	107183	m1	1.61	1.83
Microdyromys boveri sp. nov.	NB-1	107184	m1	1.59	1.87
Microdyromys boveri sp. nov.	NB-1	107185	m1	1.55	1.83
Microdyromys boveri sp. nov.	NB-1	107186	m1	1.59	1.86
Microdyromys boveri sp. nov.	NB-1	107187	m1	1.55	1.91
Microdyromys boveri sp. nov.	NB-1	107188	m1	1.67	1.87
Microdyromys boveri sp. nov.	NB-1	107189	m1	1.53	1.65
Microdyromys boveri sp. nov.	NB-1	107190	m1	1.66	1.87
Microdyromys boveri sp. nov.	NB-1	107191	m1	1.52	1.84
Microdyromys boveri sp. nov.	NB-1	107192	m1	1.61	1.97
Microdyromys boveri sp. nov.	NB-1	107196	m1	1.59	1.96
Microdyromys boveri sp. nov.	NB-1	107198	m1	1.57	1.93
Microdyromys boveri sp. nov.	NB-1	107199	m1	1.59	1.89
Microdyromys boveri sp. nov.	NB-1	107200	m1	1.64	1.94
Microdyromys boveri sp. nov.	NB-1	107208	m1	1.65	1.94
Microdyromys boveri sp. nov.	NB-1	107214	m1	1.53	1.85
Microdyromys boveri sp. nov.	NB-1	107215	m1	1.53	1.83
Microdyromys boveri sp. nov.	NB-1	107373	M-1	1.51	1.95
Microdyromys boveri sp. nov.	NB-1	107375	M-1	1.5	1.8
Microdyromys boveri sp. nov.	NB-1	107376	M-1	1.59	2.02
Microdyromys boveri sp. nov.	NB-1	107377	M-1	1.51	1.93
Microdyromys boveri sp. nov.	NB-1	107380	M-1	1.74	1.84
Microdyromys boveri sp. nov.	NB-1	107381	M-1	1.56	1.91
Microdyromys boveri sp. nov.	NB-1	107384	M-1	1.57	1.96
Microdyromys boveri sp. nov.	NB-1	107385	M-1	1.63	1.95
Microdyromys boveri sp. nov.	NB-1	107387	M-1	1.54	1.88
Microdyromys boveri sp. nov.	NB-1	107388	M-1	1.57	1.99
Microdyromys boveri sp. nov.	NB-1	107389	M-1	1.57	1.86
Microdyromys boveri sp. nov.	NB-1	107390	M-1	1.64	1.97
Microdyromys boveri sp. nov.	NB-1	107394	M-1	1.57	1.83
Microdyromys boveri sp. nov.	NB-1	107395	M-1	1.53	1.83
Microdyromys boveri sp. nov.	NB-1	107396	M-1	1.58	1.7
Microdyromys boveri sp. nov.	NB-1	107397	M-1	1.56	1.87
Microdyromys boveri sp. nov.	NB-1	107397	M-1	1.55	1.85
Microdyromys boveri sp. nov.	NB-1	107398	M-1	1.53	1.94
Microdyromys boveri sp. nov.	NB-1	107400	M-1	1.57	1.79
Microdyromys boveri sp. nov.	NB-1	107402	M-1	1.59	1.99
Microdyromys boveri sp. nov.	NB-1	107403	M-1	1.51	1.87
Microdyromys boveri sp. nov.	NB-1	107404	M-1	1.52	1.96
Microdyromys boveri sp. nov.	NB-1	107405	M-1	1.64	1.96
Microdyromys boveri sp. nov.	NB-1	107407	M-1	1.66	2.09
Microdyromys boveri sp. nov.	NB-1	107408	M-1	-	1.89
Microdyromys boveri sp. nov.	NB-1	107409	M-1	1.52	1.81
Microdyromys boveri sp. nov.	NB-1	107411	M-1	1.59	1.86
Microdyromys boveri sp. nov.	NB-1	107414	M-1	1.5	1.78
Microdyromys boveri sp. nov.	NB-1	107415	M-1	-	1.91
Microdyromys boveri sp. nov.	NB-1	107416	M-1	1.53	1.8
Microdyromys boveri sp. nov.	NB-1	107417	M-1	1.63	2
Microdyromys boveri sp. nov.	NB-1	107420	M-1	1.53	1.87
Microdyromys boveri sp. nov.	NB-1	107423	M-1	-	1.94
Microdyromys boveri sp. nov.	NB-1	107425	M-1	1.57	1.92
Microdyromys boveri sp. nov.	NB-1	107430	M-1	1.62	1.94
Microdyromys boveri sp. nov.	NB-1	107432	M-1	1.61	1.96
Microdyromys boveri sp. nov.	NB-1	107433	M-1	1.56	1.86
Microdyromys boveri sp. nov.	NB-1	107434	M-1	1.52	1.89
Microdyromys boveri sp. nov.	NB-1	107435	M-1	1.67	1.9
Microdyromys boveri sp. nov.	NB-1	107438	M-1	1.54	1.82
Microdyromys boveri sp. nov.	NB-1	107440	M-1	1.61	1.95
Microdyromys boveri sp. nov.	NB-1	107441	M-1	1.52	1.87
Microdyromys boveri sp. nov.	NB-1	107443	M-1	1.61	2.04
Microdyromys boveri sp. nov.	NB-1	107446	M-1	1.53	1.82
Microdyromys boveri sp. nov.	NB-1	107449	M-1	1.59	1.94
Microdyromys boveri sp. nov.	NB-1	107450	M-1	1.6	1.93
Microdyromys boveri sp. nov.	NB-1	107451	M-1	1.51	1.81
Microdyromys boveri sp. nov.	NB-1	107452	M-1	1.59	1.91
Microdyromys boveri sp. nov.	NB-1	107453	M-1	-	-
Microdyromys boveri sp. nov.	NB-1	107455	M-1	1.62	1.88
Microdyromys boveri sp. nov.	NB-1	107457	M-1	1.53	1.9
Microdyromys boveri sp. nov.	NB-1	107462	M-1	1.44	1.61
Microdyromys boveri sp. nov.	NB-1	107463	M-1	1.51	1.88
Microdyromys boveri sp. nov.	NB-1	107467	M-1	1.71	2
Microdyromys boveri sp. nov.	NB-1	107470	M-1	1.57	1.94
Microdyromys boveri sp. nov.	NB-1	107476	M-1	1.55	1.99
Microdyromys boveri sp. nov.	NB-1	107477	M-1	1.71	2.1
Microdyromys boveri sp. nov.	NB-1	107481	M-1	1.57	1.76
Microdyromys boveri sp. nov.	NB-1	107483	M-1	1.55	1.79
Microdyromys boveri sp. nov.	NB-1	107484	M-1	1.66	1.91
Microdyromys boveri sp. nov.	NB-1	107485	M-1	1.64	1.94
Microdyromys boveri sp. nov.	NB-1	107487	M-1	1.62	1.89
Microdyromys boveri sp. nov.	NB-1	107488	M-1	1.59	1.89
Microdyromys boveri sp. nov.	NB-1	107491	M-1	1.62	1.95
Microdyromys boveri sp. nov.	NB-1	107493	M-1	1.66	2
Microdyromys boveri sp. nov.	NB-1	107495	M-1	1.67	1.95
Microdyromys boveri sp. nov.	NB-1	107501	M-1	1.54	1.94
Microdyromys boveri sp. nov.	NB-1	107505	M-1	1.68	2.02
Microdyromys boveri sp. nov.	NB-1	107507	M-1	1.46	1.87
Microdyromys boveri sp. nov.	NB-1	107510	M-1	1.57	1.8
Microdyromys boveri sp. nov.	NB-1	107511	M-1	1.62	1.95
Microdyromys boveri sp. nov.	NB-1	107512	M-1	1.59	1.94
Microdyromys boveri sp. nov.	NB-1	107516	M-1	1.57	1.88
Microdyromys boveri sp. nov.	NB-1	107517	M-1	1.62	1.97
Microdyromys boveri sp. nov.	NB-1	107518	M-1	1.56	1.87
Microdyromys boveri sp. nov.	NB-1	107519	M-1	1.55	1.81
Microdyromys boveri sp. nov.	NB-1	107528	M-1	1.33	1.74
Microdyromys boveri sp. nov.	NB-1	107073	m1/m2	-	1.91
Microdyromys boveri sp. nov.	NB-1	107131	m1/m2	-	1.91
Microdyromys boveri sp. nov.	NB-1	107155	m1/m2	1.64	1.98
Microdyromys boveri sp. nov.	NB-1	107051	m2	1.58	1.92
Microdyromys boveri sp. nov.	NB-1	107053	m2	1.49	1.75
Microdyromys boveri sp. nov.	NB-1	107059	m2	1.59	1.97
Microdyromys boveri sp. nov.	NB-1	107060	m2	1.61	1.81
Microdyromys boveri sp. nov.	NB-1	107072	m2	1.61	1.92
Microdyromys boveri sp. nov.	NB-1	107074	m2	1.54	1.98
Microdyromys boveri sp. nov.	NB-1	107075	m2	1.61	1.87
Microdyromys boveri sp. nov.	NB-1	107081	m2	1.48	-
Microdyromys boveri sp. nov.	NB-1	107082	m2	1.62	1.85
Microdyromys boveri sp. nov.	NB-1	107101	m2	1.62	1.85
Microdyromys boveri sp. nov.	NB-1	107104	m2	1.64	1.82
Microdyromys boveri sp. nov.	NB-1	107106	m2	1.66	1.86
Microdyromys boveri sp. nov.	NB-1	107111	m2	1.65	1.87
Microdyromys boveri sp. nov.	NB-1	107113	m2	1.63	1.95
Microdyromys boveri sp. nov.	NB-1	107114	m2	1.7	1.99
Microdyromys boveri sp. nov.	NB-1	107115	m2	1.64	1.99
Microdyromys boveri sp. nov.	NB-1	107116	m2	1.61	1.92
Microdyromys boveri sp. nov.	NB-1	107117	m2	1.58	1.83
Microdyromys boveri sp. nov.	NB-1	107118	m2	1.66	1.97
Microdyromys boveri sp. nov.	NB-1	107119	m2	1.6	1.97
Microdyromys boveri sp. nov.	NB-1	107121	m2	1.6	1.88
Microdyromys boveri sp. nov.	NB-1	107122	m2	1.63	1.97
Microdyromys boveri sp. nov.	NB-1	107123	m2	1.53	1.9
Microdyromys boveri sp. nov.	NB-1	107124	m2	1.58	1.85
Microdyromys boveri sp. nov.	NB-1	107125	m2	1.53	1.87
Microdyromys boveri sp. nov.	NB-1	107126	m2	1.68	1.99
Microdyromys boveri sp. nov.	NB-1	107127	m2	1.66	2.04
Microdyromys boveri sp. nov.	NB-1	107128	m2	-	1.89
Microdyromys boveri sp. nov.	NB-1	107129	m2	1.55	1.98
Microdyromys boveri sp. nov.	NB-1	107132	m2	1.63	1.98
Microdyromys boveri sp. nov.	NB-1	107133	m2	1.54	1.89
Microdyromys boveri sp. nov.	NB-1	107134	m2	1.6	1.86
Microdyromys boveri sp. nov.	NB-1	107135	m2	-	1.98
Microdyromys boveri sp. nov.	NB-1	107136	m2	1.53	1.95
Microdyromys boveri sp. nov.	NB-1	107137	m2	1.55	1.93
Microdyromys boveri sp. nov.	NB-1	107138	m2	1.51	1.9
Microdyromys boveri sp. nov.	NB-1	107139	m2	1.55	1.83
Microdyromys boveri sp. nov.	NB-1	107140	m2	1.5	1.75
Microdyromys boveri sp. nov.	NB-1	107141	m2	1.57	1.87
Microdyromys boveri sp. nov.	NB-1	107142	m2	1.55	1.97
Microdyromys boveri sp. nov.	NB-1	107143	m2	1.55	1.92
Microdyromys boveri sp. nov.	NB-1	107146	m2	1.62	1.88
Microdyromys boveri sp. nov.	NB-1	107147	m2	1.49	1.87
Microdyromys boveri sp. nov.	NB-1	107149	m2	1.59	1.98
Microdyromys boveri sp. nov.	NB-1	107150	m2	1.69	2.02
Microdyromys boveri sp. nov.	NB-1	107151	m2	1.61	1.83
Microdyromys boveri sp. nov.	NB-1	107152	m2	1.65	2.13
Microdyromys boveri sp. nov.	NB-1	107153	m2	1.61	1.94
Microdyromys boveri sp. nov.	NB-1	107154	m2	1.61	1.9
Microdyromys boveri sp. nov.	NB-1	107156	m2	1.55	1.98
Microdyromys boveri sp. nov.	NB-1	107157	m2	1.6	2
Microdyromys boveri sp. nov.	NB-1	107158	m2	1.62	1.99
Microdyromys boveri sp. nov.	NB-1	107159	m2	1.61	1.9
Microdyromys boveri sp. nov.	NB-1	107160	m2	1.6	1.94
Microdyromys boveri sp. nov.	NB-1	107161	m2	1.51	1.87
Microdyromys boveri sp. nov.	NB-1	107167	m2	1.65	1.89
Microdyromys boveri sp. nov.	NB-1	107173	m2	1.57	1.84
Microdyromys boveri sp. nov.	NB-1	107176	m2	1.61	1.92
Microdyromys boveri sp. nov.	NB-1	107180	m2	1.59	1.81
Microdyromys boveri sp. nov.	NB-1	107193	m2	1.59	1.95
Microdyromys boveri sp. nov.	NB-1	107194	m2	1.57	1.87
Microdyromys boveri sp. nov.	NB-1	107195	m2	1.53	1.77
Microdyromys boveri sp. nov.	NB-1	107197	m2	1.68	2
Microdyromys boveri sp. nov.	NB-1	107201	m2	1.66	1.88
Microdyromys boveri sp. nov.	NB-1	107202	m2	1.6	1.85
Microdyromys boveri sp. nov.	NB-1	107203	m2	1.59	2.03
Microdyromys boveri sp. nov.	NB-1	107204	m2	1.59	1.94
Microdyromys boveri sp. nov.	NB-1	107205	m2	1.64	1.94
Microdyromys boveri sp. nov.	NB-1	107206	m2	1.7	2.04
Microdyromys boveri sp. nov.	NB-1	107207	m2	1.65	1.94
Microdyromys boveri sp. nov.	NB-1	107209	m2	1.62	1.97
Microdyromys boveri sp. nov.	NB-1	107210	m2	1.64	1.93
Microdyromys boveri sp. nov.	NB-1	107211	m2	1.59	1.87
Microdyromys boveri sp. nov.	NB-1	107212	m2	1.63	1.98
Microdyromys boveri sp. nov.	NB-1	107213	m2	1.67	1.98
Microdyromys boveri sp. nov.	NB-1	107374	M-2	1.57	2.04
Microdyromys boveri sp. nov.	NB-1	107378	M-2	1.59	1.97
Microdyromys boveri sp. nov.	NB-1	107379	M-2	1.57	2.09
Microdyromys boveri sp. nov.	NB-1	107382	M-2	1.59	2.08
Microdyromys boveri sp. nov.	NB-1	107383	M-2	1.62	2.13
Microdyromys boveri sp. nov.	NB-1	107386	M-2	1.59	2.06
Microdyromys boveri sp. nov.	NB-1	107391	M-2	1.58	2.05
Microdyromys boveri sp. nov.	NB-1	107392	M-2	1.53	2.04
Microdyromys boveri sp. nov.	NB-1	107393	M-2	1.59	2.14
Microdyromys boveri sp. nov.	NB-1	107399	M-2	1.56	2.17
Microdyromys boveri sp. nov.	NB-1	107401	M-2	1.59	2.02
Microdyromys boveri sp. nov.	NB-1	107406	M-2	1.55	2.07
Microdyromys boveri sp. nov.	NB-1	107410	M-2	1.58	2.05
Microdyromys boveri sp. nov.	NB-1	107412	M-2	1.61	2.03
Microdyromys boveri sp. nov.	NB-1	107413	M-2	1.73	2.12
Microdyromys boveri sp. nov.	NB-1	107418	M-2	1.52	1.97
Microdyromys boveri sp. nov.	NB-1	107419	M-2	1.63	2.11
Microdyromys boveri sp. nov.	NB-1	107421	M-2	1.46	1.9
Microdyromys boveri sp. nov.	NB-1	107422	M-2	1.6	2.01
Microdyromys boveri sp. nov.	NB-1	107424	M-2	1.5	1.96
Microdyromys boveri sp. nov.	NB-1	107426	M-2	1.67	2.02
Microdyromys boveri sp. nov.	NB-1	107427	M-2	1.61	2.01
Microdyromys boveri sp. nov.	NB-1	107428	M-2	1.61	-
Microdyromys boveri sp. nov.	NB-1	107429	M-2	1.61	2
Microdyromys boveri sp. nov.	NB-1	107431	M-2	1.64	1.98
Microdyromys boveri sp. nov.	NB-1	107436	M-2	1.57	2.09
Microdyromys boveri sp. nov.	NB-1	107437	M-2	1.53	-
Microdyromys boveri sp. nov.	NB-1	107439	M-2	1.54	2.02
Microdyromys boveri sp. nov.	NB-1	107442	M-2	1.62	2.05
Microdyromys boveri sp. nov.	NB-1	107444	M-2	1.62	2.04
Microdyromys boveri sp. nov.	NB-1	107445	M-2	1.58	2.03
Microdyromys boveri sp. nov.	NB-1	107447	M-2	1.63	2.05
Microdyromys boveri sp. nov.	NB-1	107448	M-2	1.4	1.85
Microdyromys boveri sp. nov.	NB-1	107454	M-2	1.6	2.04
Microdyromys boveri sp. nov.	NB-1	107456	M-2	1.56	2.03
Microdyromys boveri sp. nov.	NB-1	107458	M-2	1.54	1.99
Microdyromys boveri sp. nov.	NB-1	107459	M-2	1.53	2.01
Microdyromys boveri sp. nov.	NB-1	107460	M-2	1.62	2.09
Microdyromys boveri sp. nov.	NB-1	107461	M-2	1.63	2.02
Microdyromys boveri sp. nov.	NB-1	107464	M-2	1.71	2.12
Microdyromys boveri sp. nov.	NB-1	107465	M-2	1.58	2.05
Microdyromys boveri sp. nov.	NB-1	107466	M-2	1.51	2.02
Microdyromys boveri sp. nov.	NB-1	107468	M-2	1.6	2.07
Microdyromys boveri sp. nov.	NB-1	107469	M-2	1.53	1.87
Microdyromys boveri sp. nov.	NB-1	107471	M-2	1.59	2.03
Microdyromys boveri sp. nov.	NB-1	107472	M-2	1.64	2.01
Microdyromys boveri sp. nov.	NB-1	107473	M-2	1.65	2.19
Microdyromys boveri sp. nov.	NB-1	107474	M-2	1.61	2
Microdyromys boveri sp. nov.	NB-1	107475	M-2	1.51	1.9
Microdyromys boveri sp. nov.	NB-1	107478	M-2	1.57	2.08
Microdyromys boveri sp. nov.	NB-1	107479	M-2	1.56	1.94
Microdyromys boveri sp. nov.	NB-1	107480	M-2	1.65	2.09
Microdyromys boveri sp. nov.	NB-1	107482	M-2	1.51	1.94
Microdyromys boveri sp. nov.	NB-1	107486	M-2	1.6	1.99
Microdyromys boveri sp. nov.	NB-1	107489	M-2	1.67	2.05
Microdyromys boveri sp. nov.	NB-1	107490	M-2	1.62	2.05
Microdyromys boveri sp. nov.	NB-1	107492	M-2	1.66	1.98
Microdyromys boveri sp. nov.	NB-1	107494	M-2	1.64	2.05
Microdyromys boveri sp. nov.	NB-1	107496	M-2	1.6	2
Microdyromys boveri sp. nov.	NB-1	107497	M-2	1.62	2.1
Microdyromys boveri sp. nov.	NB-1	107498	M-2	1.52	1.93
Microdyromys boveri sp. nov.	NB-1	107499	M-2	1.65	2.03
Microdyromys boveri sp. nov.	NB-1	107500	M-2	1.66	2.14
Microdyromys boveri sp. nov.	NB-1	107502	M-2	1.59	2.02
Microdyromys boveri sp. nov.	NB-1	107503	M-2	1.57	2.06
Microdyromys boveri sp. nov.	NB-1	107504	M-2	1.59	2.01
Microdyromys boveri sp. nov.	NB-1	107506	M-2	1.54	2.02
Microdyromys boveri sp. nov.	NB-1	107508	M-2	1.68	2.24
Microdyromys boveri sp. nov.	NB-1	107509	M-2	1.68	2.16
Microdyromys boveri sp. nov.	NB-1	107513	M-2	1.64	2.09
Microdyromys boveri sp. nov.	NB-1	107514	M-2	1.58	2
Microdyromys boveri sp. nov.	NB-1	107515	M-2	1.62	2.03
Microdyromys boveri sp. nov.	NB-1	107216	m3	1.39	1.61
Microdyromys boveri sp. nov.	NB-1	107217	m3	1.35	1.51
Microdyromys boveri sp. nov.	NB-1	107218	m3	1.43	1.56
Microdyromys boveri sp. nov.	NB-1	107219	m3	1.35	1.62
Microdyromys boveri sp. nov.	NB-1	107220	m3	1.47	1.59
Microdyromys boveri sp. nov.	NB-1	107221	m3	1.36	1.55
Microdyromys boveri sp. nov.	NB-1	107222	m3	1.21	1.59
Microdyromys boveri sp. nov.	NB-1	107223	m3	-	1.56
Microdyromys boveri sp. nov.	NB-1	107224	m3	1.47	1.59
Microdyromys boveri sp. nov.	NB-1	107225	m3	1.43	1.62
Microdyromys boveri sp. nov.	NB-1	107226	m3	1.39	1.51
Microdyromys boveri sp. nov.	NB-1	107228	m3	1.37	1.54
Microdyromys boveri sp. nov.	NB-1	107229	m3	1.43	1.61
Microdyromys boveri sp. nov.	NB-1	107230	m3	1.38	1.57
Microdyromys boveri sp. nov.	NB-1	107231	m3	1.42	1.55
Microdyromys boveri sp. nov.	NB-1	107232	m3	1.29	1.55
Microdyromys boveri sp. nov.	NB-1	107233	m3	1.43	1.56
Microdyromys boveri sp. nov.	NB-1	107234	m3	1.35	1.5
Microdyromys boveri sp. nov.	NB-1	107235	m3	1.36	1.56
Microdyromys boveri sp. nov.	NB-1	107236	m3	1.39	1.55
Microdyromys boveri sp. nov.	NB-1	107237	m3	1.34	1.52
Microdyromys boveri sp. nov.	NB-1	107238	m3	1.21	1.46
Microdyromys boveri sp. nov.	NB-1	107239	m3	1.36	1.64
Microdyromys boveri sp. nov.	NB-1	107240	m3	1.31	1.53
Microdyromys boveri sp. nov.	NB-1	107241	m3	1.43	1.53
Microdyromys boveri sp. nov.	NB-1	107242	m3	1.33	1.51
Microdyromys boveri sp. nov.	NB-1	107243	m3	1.34	1.55
Microdyromys boveri sp. nov.	NB-1	107244	m3	1.36	1.57
Microdyromys boveri sp. nov.	NB-1	107245	m3	1.32	1.43
Microdyromys boveri sp. nov.	NB-1	107246	m3	1.39	1.56
Microdyromys boveri sp. nov.	NB-1	107247	m3	1.4	1.59
Microdyromys boveri sp. nov.	NB-1	107248	m3	1.34	1.52
Microdyromys boveri sp. nov.	NB-1	107249	m3	1.44	1.57
Microdyromys boveri sp. nov.	NB-1	107250	m3	1.32	1.48
Microdyromys boveri sp. nov.	NB-1	107251	m3	1.39	1.51
Microdyromys boveri sp. nov.	NB-1	107252	m3	1.17	1.43
Microdyromys boveri sp. nov.	NB-1	107253	m3	1.4	1.6
Microdyromys boveri sp. nov.	NB-1	107254	m3	1.39	1.51
Microdyromys boveri sp. nov.	NB-1	107255	m3	1.42	1.53
Microdyromys boveri sp. nov.	NB-1	107256	m3	1.35	1.49
Microdyromys boveri sp. nov.	NB-1	107257	m3	1.35	1.52
Microdyromys boveri sp. nov.	NB-1	107258	m3	1.41	1.61
Microdyromys boveri sp. nov.	NB-1	107259	m3	1.42	1.56
Microdyromys boveri sp. nov.	NB-1	107260	m3	1.43	1.59
Microdyromys boveri sp. nov.	NB-1	107261	m3	1.38	1.6
Microdyromys boveri sp. nov.	NB-1	107262	m3	1.47	1.54
Microdyromys boveri sp. nov.	NB-1	107263	m3	1.34	1.55
Microdyromys boveri sp. nov.	NB-1	107264	m3	1.44	1.49
Microdyromys boveri sp. nov.	NB-1	107265	m3	1.43	1.51
Microdyromys boveri sp. nov.	NB-1	107266	m3	1.41	1.6
Microdyromys boveri sp. nov.	NB-1	107267	m3	1.41	1.66
Microdyromys boveri sp. nov.	NB-1	107268	m3	1.33	1.51
Microdyromys boveri sp. nov.	NB-1	107269	m3	1.26	1.45
Microdyromys boveri sp. nov.	NB-1	107270	m3	1.47	1.57
Microdyromys boveri sp. nov.	NB-1	107271	m3	1.26	1.45
Microdyromys boveri sp. nov.	NB-1	107272	m3	1.41	1.48
Microdyromys boveri sp. nov.	NB-1	107273	m3	1.4	1.59
Microdyromys boveri sp. nov.	NB-1	107274	m3	1.44	1.57
Microdyromys boveri sp. nov.	NB-1	107275	m3	1.35	1.5
Microdyromys boveri sp. nov.	NB-1	107276	m3	1.35	1.62
Microdyromys boveri sp. nov.	NB-1	107277	m3	1.31	1.54
Microdyromys boveri sp. nov.	NB-1	107278	m3	1.49	1.56
Microdyromys boveri sp. nov.	NB-1	107279	m3	1.41	1.53
Microdyromys boveri sp. nov.	NB-1	107280	m3	1.4	1.54
Microdyromys boveri sp. nov.	NB-1	107281	m3	1.28	1.45
Microdyromys boveri sp. nov.	NB-1	107282	m3	1.32	1.62
Microdyromys boveri sp. nov.	NB-1	107283	m3	1.41	1.54
Microdyromys boveri sp. nov.	NB-1	107284	m3	1.33	1.51
Microdyromys boveri sp. nov.	NB-1	107285	m3	1.36	1.54
Microdyromys boveri sp. nov.	NB-1	107286	m3	1.35	1.47
Microdyromys boveri sp. nov.	NB-1	107287	m3	1.36	1.49
Microdyromys boveri sp. nov.	NB-1	107288	m3	1.35	1.6
Microdyromys boveri sp. nov.	NB-1	107289	m3	1.38	1.51
Microdyromys boveri sp. nov.	NB-1	107290	m3	1.43	1.52
Microdyromys boveri sp. nov.	NB-1	107291	m3	1.36	1.57
Microdyromys boveri sp. nov.	NB-1	107292	m3	1.46	1.59
Microdyromys boveri sp. nov.	NB-1	107293	m3	1.28	1.47
Microdyromys boveri sp. nov.	NB-1	107294	m3	1.38	1.64
Microdyromys boveri sp. nov.	NB-1	107295	m3	1.41	1.57
Microdyromys boveri sp. nov.	NB-1	107296	m3	1.37	1.6
Microdyromys boveri sp. nov.	NB-1	107297	m3	1.28	1.62
Microdyromys boveri sp. nov.	NB-1	107298	m3	1.42	1.53
Microdyromys boveri sp. nov.	NB-1	107299	m3	1.32	1.53
Microdyromys boveri sp. nov.	NB-1	107323	m3	-	1.42
Microdyromys boveri sp. nov.	NB-1	107520	M-3	1.2	1.59
Microdyromys boveri sp. nov.	NB-1	107521	M-3	1.24	1.65
Microdyromys boveri sp. nov.	NB-1	107522	M-3	1.26	1.66
Microdyromys boveri sp. nov.	NB-1	107523	M-3	1.28	1.65
Microdyromys boveri sp. nov.	NB-1	107524	M-3	1.27	1.62
Microdyromys boveri sp. nov.	NB-1	107525	M-3	1.3	1.62
Microdyromys boveri sp. nov.	NB-1	107526	M-3	1.19	1.61
Microdyromys boveri sp. nov.	NB-1	107527	M-3	1.23	1.56
Microdyromys boveri sp. nov.	NB-1	107529	M-3	1.28	1.64
Microdyromys boveri sp. nov.	NB-1	107530	M-3	1.34	1.67
Microdyromys boveri sp. nov.	NB-1	107531	M-3	1.34	1.7
Microdyromys boveri sp. nov.	NB-1	107532	M-3	1.27	1.68
Microdyromys boveri sp. nov.	NB-1	107533	M-3	1.26	1.62
Microdyromys boveri sp. nov.	NB-1	107534	M-3	1.32	1.7
Microdyromys boveri sp. nov.	NB-1	107535	M-3	1.33	1.8
Microdyromys boveri sp. nov.	NB-1	107536	M-3	1.26	1.64
Microdyromys boveri sp. nov.	NB-1	107537	M-3	1.31	1.66
Microdyromys boveri sp. nov.	NB-1	107538	M-3	1.27	1.76
Microdyromys boveri sp. nov.	NB-1	107539	M-3	-	1.67
Microdyromys boveri sp. nov.	NB-1	107540	M-3	1.28	1.68
Microdyromys boveri sp. nov.	NB-1	107541	M-3	1.28	-
Microdyromys boveri sp. nov.	NB-1	107542	M-3	1.29	1.8
Microdyromys boveri sp. nov.	NB-1	107543	M-3	1.29	1.75
Microdyromys boveri sp. nov.	NB-1	107544	M-3	1.27	1.66
Microdyromys boveri sp. nov.	NB-1	107545	M-3	1.13	1.49
Microdyromys boveri sp. nov.	NB-1	107546	M-3	1.27	1.62
Microdyromys boveri sp. nov.	NB-1	107547	M-3	1.3	1.65
Microdyromys boveri sp. nov.	NB-1	107548	M-3	1.37	1.78
Microdyromys boveri sp. nov.	NB-1	107549	M-3	1.27	1.62
Microdyromys boveri sp. nov.	NB-1	107550	M-3	1	1.3
Microdyromys boveri sp. nov.	NB-1	107551	M-3	1.25	1.68
Microdyromys boveri sp. nov.	NB-1	107552	M-3	1.31	1.69
Microdyromys boveri sp. nov.	NB-1	107553	M-3	1.27	1.68
Microdyromys boveri sp. nov.	NB-1	107554	M-3	1.29	1.61
Microdyromys boveri sp. nov.	NB-1	107555	M-3	1.19	1.66
Microdyromys boveri sp. nov.	NB-1	107556	M-3	1.22	1.57
Microdyromys boveri sp. nov.	NB-1	107557	M-3	1.25	1.62
Microdyromys boveri sp. nov.	NB-1	107558	M-3	1.24	1.77
Microdyromys boveri sp. nov.	NB-1	107559	M-3	1.31	1.68
Microdyromys boveri sp. nov.	NB-1	107560	M-3	1.29	1.61
Microdyromys boveri sp. nov.	NB-1	107561	M-3	1.28	1.79
Microdyromys boveri sp. nov.	NB-1	107563	M-3	1.34	1.65
Microdyromys boveri sp. nov.	NB-1	107564	M-3	1.28	1.62
Microdyromys boveri sp. nov.	NB-1	107565	M-3	1.22	1.79
Microdyromys boveri sp. nov.	NB-1	107566	M-3	1.33	1.81
Microdyromys boveri sp. nov.	NB-1	107567	M-3	1.28	1.72
Microdyromys boveri sp. nov.	NB-1	107568	M-3	1.27	1.66
Microdyromys boveri sp. nov.	NB-1	107569	M-3	1.28	1.7
Microdyromys boveri sp. nov.	NB-1	107570	M-3	1.26	1.74
Microdyromys boveri sp. nov.	NB-1	107571	M-3	1.26	1.69
Microdyromys boveri sp. nov.	NB-1	107572	M-3	1.2	1.6
Microdyromys boveri sp. nov.	NB-1	107573	M-3	1.3	1.72
Microdyromys boveri sp. nov.	NB-1	107574	M-3	1.21	1.6
Microdyromys boveri sp. nov.	NB-1	107575	M-3	1.32	1.72
Microdyromys boveri sp. nov.	NB-1	107576	M-3	1.26	1.68
Microdyromys boveri sp. nov.	NB-1	107577	M-3	1.21	1.72
Microdyromys boveri sp. nov.	NB-1	107578	M-3	1.25	1.8
Microdyromys boveri sp. nov.	NB-1	107579	M-3	1.29	1.6
Microdyromys boveri sp. nov.	NB-1	107580	M-3	1.37	1.78
Microdyromys boveri sp. nov.	NB-1	107581	M-3	1.32	1.72
Microdyromys boveri sp. nov.	NB-1	107582	M-3	1.29	1.81
Microdyromys boveri sp. nov.	NB-1	107583	M-3	1.28	1.7
Microdyromys boveri sp. nov.	NB-1	107584	M-3	1.3	1.73
Microdyromys boveri sp. nov.	NB-1	107585	M-3	1.32	1.72
Microdyromys boveri sp. nov.	NB-1	107586	M-3	1.29	1.61
Microdyromys boveri sp. nov.	NB-1	107587	M-3	1.22	1.61
Microdyromys boveri sp. nov.	NB-1	107588	M-3	1.34	1.78
Microdyromys boveri sp. nov.	NB-1	107589	M-3	1.23	1.54
Microdyromys boveri sp. nov.	NB-1	107590	M-3	1.27	1.62
Microdyromys boveri sp. nov.	NB-1	107591	M-3	1.28	1.71
Microdyromys boveri sp. nov.	NB-1	107592	M-3	1.36	1.74
Microdyromys boveri sp. nov.	NB-1	103983	p4_inf	1.49	1.41
Microdyromys boveri sp. nov.	NB-1	103984	p4_inf	1.26	1
Microdyromys boveri sp. nov.	NB-1	103985	p4_inf	1.44	1.34
Microdyromys boveri sp. nov.	NB-1	103986	p4_inf	1.46	1.33
Microdyromys boveri sp. nov.	NB-1	103987	p4_inf	1.44	1.36
Microdyromys boveri sp. nov.	NB-1	103988	p4_inf	1.35	1.29
Microdyromys boveri sp. nov.	NB-1	103989	p4_inf	1.48	1.37
Microdyromys boveri sp. nov.	NB-1	103990	p4_inf	1.34	1.22
Microdyromys boveri sp. nov.	NB-1	103991	p4_inf	1.4	1.34
Microdyromys boveri sp. nov.	NB-1	103992	p4_inf	1.51	1.47
Microdyromys boveri sp. nov.	NB-1	103993	p4_inf	1.42	1.28
Microdyromys boveri sp. nov.	NB-1	103994	p4_inf	1.55	1.39
Microdyromys boveri sp. nov.	NB-1	103995	p4_inf	1.34	1.24
Microdyromys boveri sp. nov.	NB-1	103996	p4_inf	1.47	1.33
Microdyromys boveri sp. nov.	NB-1	103997	p4_inf	1.49	1.39
Microdyromys boveri sp. nov.	NB-1	103998	p4_inf	1.54	1.32
Microdyromys boveri sp. nov.	NB-1	103999	p4_inf	1.33	1.27
Microdyromys boveri sp. nov.	NB-1	104000	p4_inf	1.57	1.4
Microdyromys boveri sp. nov.	NB-1	107001	p4_inf	1.4	1.25
Microdyromys boveri sp. nov.	NB-1	107002	p4_inf	1.55	1.41
Microdyromys boveri sp. nov.	NB-1	107003	p4_inf	1.54	1.42
Microdyromys boveri sp. nov.	NB-1	107004	p4_inf	1.4	1.31
Microdyromys boveri sp. nov.	NB-1	107005	p4_inf	1.3	1.21
Microdyromys boveri sp. nov.	NB-1	107006	p4_inf	1.38	1.28
Microdyromys boveri sp. nov.	NB-1	107007	p4_inf	1.3	1.24
Microdyromys boveri sp. nov.	NB-1	107008	p4_inf	1.23	1.15
Microdyromys boveri sp. nov.	NB-1	107009	p4_inf	1.44	1.28
Microdyromys boveri sp. nov.	NB-1	107010	p4_inf	1.49	1.39
Microdyromys boveri sp. nov.	NB-1	107011	p4_inf	1.4	1.29
Microdyromys boveri sp. nov.	NB-1	107012	p4_inf	1.36	1.28
Microdyromys boveri sp. nov.	NB-1	107013	p4_inf	1.43	1.34
Microdyromys boveri sp. nov.	NB-1	107014	p4_inf	1.41	1.28
Microdyromys boveri sp. nov.	NB-1	107015	p4_inf	1.5	1.29
Microdyromys boveri sp. nov.	NB-1	107016	p4_inf	1.32	1.28
Microdyromys boveri sp. nov.	NB-1	107017	p4_inf	1.42	1.31
Microdyromys boveri sp. nov.	NB-1	107018	p4_inf	1.46	1.4
Microdyromys boveri sp. nov.	NB-1	107019	p4_inf	1.41	1.37
Microdyromys boveri sp. nov.	NB-1	107020	p4_inf	1.45	1.4
Microdyromys boveri sp. nov.	NB-1	107021	p4_inf	1.43	1.34
Microdyromys boveri sp. nov.	NB-1	107022	p4_inf	1.4	1.29
Microdyromys boveri sp. nov.	NB-1	107023	p4_inf	1.52	1.4
Microdyromys boveri sp. nov.	NB-1	107024	p4_inf	1.47	-
Microdyromys boveri sp. nov.	NB-1	107025	p4_inf	1.24	1.17
Microdyromys boveri sp. nov.	NB-1	107026	p4_inf	1.43	1.31
Microdyromys boveri sp. nov.	NB-1	107027	p4_inf	1.49	1.35
Microdyromys boveri sp. nov.	NB-1	107028	p4_inf	1.5	1.32
Microdyromys boveri sp. nov.	NB-1	107029	p4_inf	1.38	1.31
Microdyromys boveri sp. nov.	NB-1	107030	p4_inf	1.42	1.34
Microdyromys boveri sp. nov.	NB-1	107031	p4_inf	1.49	1.4
Microdyromys boveri sp. nov.	NB-1	107032	p4_inf	1.49	1.35
Microdyromys boveri sp. nov.	NB-1	107033	p4_inf	1.33	1.22
Microdyromys boveri sp. nov.	NB-1	107034	p4_inf	1.44	1.32
Microdyromys boveri sp. nov.	NB-1	107035	p4_inf	1.48	1.37
Microdyromys boveri sp. nov.	NB-1	107036	p4_inf	1.45	1.31
Microdyromys boveri sp. nov.	NB-1	107037	p4_inf	1.42	1.28
Microdyromys boveri sp. nov.	NB-1	107038	p4_inf	1.44	1.4
Microdyromys boveri sp. nov.	NB-1	107039	p4_inf	1.49	1.34
Microdyromys boveri sp. nov.	NB-1	107040	p4_inf	1.49	1.37
Microdyromys boveri sp. nov.	NB-1	107041	p4_inf	1.58	1.41
Microdyromys boveri sp. nov.	NB-1	107042	p4_inf	1.47	1.41
Microdyromys boveri sp. nov.	NB-1	107044	p4_inf	1.53	1.4
Microdyromys boveri sp. nov.	NB-1	107045	p4_inf	1.45151	1.39
Microdyromys boveri sp. nov.	NB-1	107046	p4_inf	1.452	1.38
Microdyromys boveri sp. nov.	NB-1	107300	P4_sup	1.14	1.66
Microdyromys boveri sp. nov.	NB-1	107301	P4_sup	1.26	1.71
Microdyromys boveri sp. nov.	NB-1	107302	P4_sup	1.21	1.7
Microdyromys boveri sp. nov.	NB-1	107303	P4_sup	1.11	1.55
Microdyromys boveri sp. nov.	NB-1	107304	P4_sup	1.19	-
Microdyromys boveri sp. nov.	NB-1	107305	P4_sup	1.19	1.62
Microdyromys boveri sp. nov.	NB-1	107306	P4_sup	1.11	1.64
Microdyromys boveri sp. nov.	NB-1	107307	P4_sup	1.13	1.66
Microdyromys boveri sp. nov.	NB-1	107308	P4_sup	1.19	1.6
Microdyromys boveri sp. nov.	NB-1	107309	P4_sup	1.15	1.62
Microdyromys boveri sp. nov.	NB-1	107310	P4_sup	1.21	1.64
Microdyromys boveri sp. nov.	NB-1	107311	P4_sup	1.13	1.64
Microdyromys boveri sp. nov.	NB-1	107312	P4_sup	1.23	1.65
Microdyromys boveri sp. nov.	NB-1	107314	P4_sup	1.25	1.72
Microdyromys boveri sp. nov.	NB-1	107315	P4_sup	1.03	1.43
Microdyromys boveri sp. nov.	NB-1	107316	P4_sup	1.15	1.6
Microdyromys boveri sp. nov.	NB-1	107317	P4_sup	1.16	1.57
Microdyromys boveri sp. nov.	NB-1	107319	P4_sup	1.12	1.57
Microdyromys boveri sp. nov.	NB-1	107320	P4_sup	1.17	1.55
Microdyromys boveri sp. nov.	NB-1	107321	P4_sup	1.2	1.68
Microdyromys boveri sp. nov.	NB-1	107324	P4_sup	1.26	1.78
Microdyromys boveri sp. nov.	NB-1	107327	P4_sup	1.17	1.7
Microdyromys boveri sp. nov.	NB-1	107328	P4_sup	1.13	1.62
Microdyromys boveri sp. nov.	NB-1	107331	P4_sup	1.14	1.59
Microdyromys boveri sp. nov.	NB-1	107332	P4_sup	1.13	1.58
Microdyromys boveri sp. nov.	NB-1	107335	P4_sup	1.13	1.56
Microdyromys boveri sp. nov.	NB-1	107336	P4_sup	1.14	1.7
Microdyromys boveri sp. nov.	NB-1	107337	P4_sup	1.21	1.7
Microdyromys boveri sp. nov.	NB-1	107338	P4_sup	1.17	1.54
Microdyromys boveri sp. nov.	NB-1	107342	P4_sup	1.19	1.68
Microdyromys boveri sp. nov.	NB-1	107343	P4_sup	1.12	1.62
Microdyromys boveri sp. nov.	NB-1	107344	P4_sup	1.17	1.64
Microdyromys boveri sp. nov.	NB-1	107345	P4_sup	1.12	1.57
Microdyromys boveri sp. nov.	NB-1	107346	P4_sup	1.14	1.52
Microdyromys boveri sp. nov.	NB-1	107347	P4_sup	1.21	1.59
Microdyromys boveri sp. nov.	NB-1	107348	P4_sup	1.21	1.62
Microdyromys boveri sp. nov.	NB-1	107349	P4_sup	1.14	1.62
Microdyromys boveri sp. nov.	NB-1	107351	P4_sup	1.14	1.64
Microdyromys boveri sp. nov.	NB-1	107352	P4_sup	1.19	1.65
Microdyromys boveri sp. nov.	NB-1	107353	P4_sup	1.21	1.63
Microdyromys boveri sp. nov.	NB-1	107355	P4_sup	1.13	1.59
Microdyromys boveri sp. nov.	NB-1	107356	P4_sup	1.19	1.64
Microdyromys boveri sp. nov.	NB-1	107357	P4_sup	1.12	1.57
Microdyromys boveri sp. nov.	NB-1	107358	P4_sup	1.2	1.62
Microdyromys boveri sp. nov.	NB-1	107359	P4_sup	1.2	1.63
Microdyromys boveri sp. nov.	NB-1	107360	P4_sup	1.12	1.58
Microdyromys boveri sp. nov.	NB-1	107361	P4_sup	1.21	1.68
Microdyromys boveri sp. nov.	NB-1	107362	P4_sup	1.23	1.71
Microdyromys boveri sp. nov.	NB-1	107363	P4_sup	1.21	1.71
Microdyromys boveri sp. nov.	NB-1	107364	P4_sup	1.2	1.61
Microdyromys boveri sp. nov.	NB-1	107365	P4_sup	1.13	1.57
Microdyromys boveri sp. nov.	NB-1	107366	P4_sup	1.18	1.57
Microdyromys boveri sp. nov.	NB-1	107367	P4_sup	1.22	1.64
Microdyromys boveri sp. nov.	NB-1	107368	P4_sup	1.13	1.53
Microdyromys boveri sp. nov.	NB-1	107369	P4_sup	1.09	1.62
Microdyromys boveri sp. nov.	NB-1	107370	P4_sup	1.15	1.55
Microdyromys boveri sp. nov.	NB-1	107371	P4_sup	1.16	1.66
Microdyromys boveri sp. nov.	NB-1	107372	P4_sup	1.15	1.58
